# Supplementary material for: Amino Acids and TOR Signaling Promote Prothoracic Gland Growth and the Initiation of Larval Molts in the Tobacco Hornworm Manduca sexta
Source: PubMed Central journal article supplement (PMC3440373; doi:10.1371/journal.pone.0044429), 2012-09-12
Supplement: pone.0044429.s001.pdf [file pone.0044429.s001.pdf]

## Supporting information

**Table S1: Ingredients for the various diets used in this study.**

Normal diet = Ingredients A + B

Negative control diet = Ingredient B

Casein only diet = Casein + Ingredient B

Sucrose only diet = Sucrose + Ingredient B

Sucrose + casein diet = (8%- % casein) Sucrose + % Casein + Ingredient B

Ingredient A. Nutritive base

| INGREDIENTS  | AMOUNT  |
|--------------|---------|
| Wheat germ   | 107.6 g |
| Casein       | 48.4 g  |
| Sucrose      | 43.0 g  |
| Torula yeast | 21.5 g  |
| Cholesterol  | 4.71 g  |

Ingredient B. Non-nutritive base

| INGREDIENTS        | AMOUNT                         |
|--------------------|--------------------------------|
| Distilled water    | 1000 ml                        |
| Gelcarin           | 15.7 g                         |
| Wessons salt       | 16.1 g                         |
| Sorbic acid        | 2.7 g                          |
| Methyl paraben     | 1.3 g                          |
| Ascorbic acid      | 6.7 g                          |
| Streptomycin       | 0.27 g                         |
| Kanamycin          | 0.07 g                         |
| 36.5% formalin     | 8.6 ml                         |
| <b>Vitamin mix</b> | <b>Dissolved in 10ml water</b> |
| Nicotinic acid     | 13.5 mg                        |
| Riboflavin         | 6.73 mg                        |
| Thiamine           | 3.14 mg                        |
| Pyriodoxine        | 3.14 mg                        |
| Folic acid         | 3.14 mg                        |
| Biotin             | 0.27 mg                        |
